# Supplementary material
Source: publisher figshare collection journal article supplement (https://acs.figshare.com/ndownloader/files/18594494)
Supplement: Supplementary file 1 [file 18594494]

# Ceramic-Supported Polyhedral Oligomeric Silsesquioxane-Organosilica Nanocomposite Membrane for Efficient Gas Separation

*Xiuxiu Ren,<sup>\*,†</sup> Masakoto Kanezashi,<sup>‡</sup> Hiroki Nagasawa,<sup>‡</sup> Rong Xu,<sup>†</sup> Jing Zhong,<sup>†</sup> and Toshinori Tsuru<sup>\*,‡</sup>*

<sup>†</sup>Jiangsu Key Laboratory of Advanced Catalytic Materials and Technology, School of Petrochemical Engineering, Changzhou University, Changzhou, 213164, China.

<sup>‡</sup>Separation Engineering Laboratory, Department of Chemical Engineering, Hiroshima University, 1-4-1, Kagamiyama, Higashi-Hiroshima, 739-8527, Japan.

----- (SI-1) -----

The diffusivity ( $D$ ) of CO<sub>2</sub> as a function of POSS content is shown in Figure S1.  $D$  is calculated based on the equation:  $P=D\cdot S$ .  $P$  is the permeability that can be calculated using the permeance of CO<sub>2</sub> (40 °C) divided by the membrane thickness of 200nm.<sup>23,25</sup> The solubility of  $S$  is obtained from the adsorption amount of CO<sub>2</sub> at 308 K (pure BTESE was tested at 298 K).

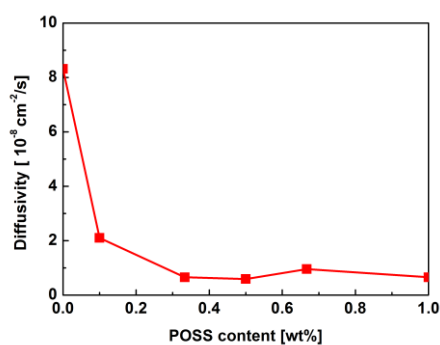

**Figure S1.** Diffusivity of CO<sub>2</sub> around 40 °C as a function of POSS content.

----- (SI-2) -----

The surface morphology of BTESE-POSS composite film was characterized via a laser microscope (KEYENCE, VK-X200), as shown in Figure S2.

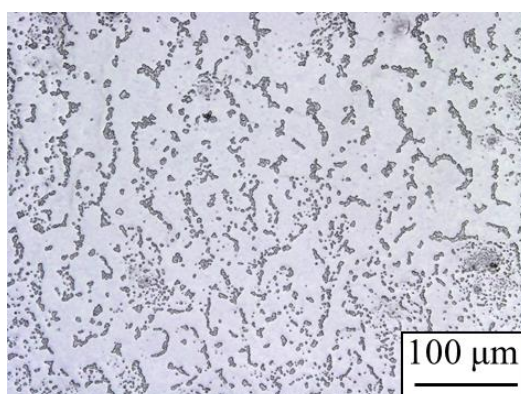

**Figure S2.** Microscopic surface image of BTESE-POSS (33.3%) film.
